# Supplementary material for: Disparities in recommended preventive care usage among persons living with diabetes in the Appalachian region
Source: PubMed Central journal article supplement — BMJ Open Diabetes Res Care. 2016 Dec 23;4(1):e000284. doi: 10.1136/bmjdrc-2016-000284 (PMC5220277; doi:10.1136/bmjdrc-2016-000284), 2016-12-23
Supplement: bmjdrc-2016-000284supp_tables.pdf [file bmjdrc-2016-000284supp_tables.pdf]

Table A1 (for online publication): American Diabetes Association Guideline-Recommended Preventive Care for Diabetic Patients

| Preventive Care                        | BRFSS Question                                                                                                                                                | Coding                                                                                                 |
|----------------------------------------|---------------------------------------------------------------------------------------------------------------------------------------------------------------|--------------------------------------------------------------------------------------------------------|
| Daily Self-Monitoring of Blood Glucose | About how often do you check your blood for glucose or sugar?                                                                                                 | $\geq 7$ / week = met the guideline; < 7 or 888 did not meet; 777, 999 or missing = excluded           |
| Daily Self-Exam of Feet                | About how often do you check your feet for any sores or irritations?                                                                                          | $\geq 7$ / week = met the guideline; < 7 or 888 did not meet; 555, 777, 999 or missing = excluded      |
| Two or More A1c Tests Last Year        | About how many times in the past 12 months has a doctor, nurse, or other health professional checked your A1c?                                                | 2 - 76 = met the guideline; 1, 77, 88, or 98 did not meet; 99 or missing = excluded                    |
| Annual Foot Exam                       | About how many times in the past 12 months has a health professional checked your feet for any sores or irritations?                                          | 1 - 76 = met the guideline; 88 did not meet; 77, 99, missing = excluded                                |
| Annual Eye Exam                        | When was the last time you had an eye exam in which the pupils were dilated?                                                                                  | 1, 2 = met the guideline; 3, 4, or 8 = did not meet; 7, 9, missing = excluded                          |
| Annual Doctor Visit                    | About how many times in the past 12 months have you seen a doctor, nurse, or other health professional for your diabetes?                                     | $\geq 1$ = met the guideline; 88 = did not meet; 77, 99, missing = excluded                            |
| Annual Flu Vaccination                 | During the past 12 months, have you had a seasonal flu shot?<br>During the past 12 months, have you had a seasonal flu vaccine that was sprayed in your nose? | 1 in either question = met the guideline; 2 in both questions = did not meet; 7, 9, missing = excluded |
| Self-Management Education              | Have you ever taken a course or class in how to manage your diabetes yourself?                                                                                | 1 = met the guideline; 2 = did not meet; 7, 9, missing = excluded                                      |
| Pneumococcal Vaccination               | Have you ever had a pneumonia shot?                                                                                                                           | 1 = met the guideline; 2 = did not meet; 7, 9, missing = excluded                                      |

Table A2 (for online publication): Number of respondents used in this study by year, county economic level, and age

| County Economic Level  | All adults |        |        |         | All adults < 65 y |        |        |        | All adults ≥ 65 y |        |        |        |
|------------------------|------------|--------|--------|---------|-------------------|--------|--------|--------|-------------------|--------|--------|--------|
|                        | 2008       | 2009   | 2010   | Total   | 2008              | 2009   | 2010   | Total  | 2008              | 2009   | 2010   | Total  |
| Distressed             | 569        | 715    | 704    | 1,988   | 332               | 421    | 408    | 1,161  | 237               | 294    | 296    | 827    |
| At-Risk                | 741        | 809    | 813    | 2,363   | 415               | 425    | 443    | 1,283  | 326               | 384    | 370    | 1,080  |
| Transitional           | 3,104      | 2,808  | 2,968  | 8,880   | 1,595             | 1,416  | 1,433  | 4,444  | 1,509             | 1,392  | 1,535  | 4,436  |
| Competitive/Attainment | 286        | 388    | 476    | 1,150   | 151               | 173    | 219    | 543    | 135               | 215    | 257    | 607    |
| Non-Appalachian        | 36,979     | 41,379 | 46,093 | 124,451 | 18,883            | 20,655 | 22,302 | 61,840 | 18,096            | 20,724 | 23,791 | 62,611 |
| Total                  | 41,679     | 46,099 | 51,054 | 138,832 | 21,376            | 23,090 | 24,805 | 69,271 | 20,303            | 23,009 | 26,249 | 69,561 |

\* Respondents who were aged 18 years or older and had diabetes. Respondents residing in Puerto Rico, Virgin Islands, and Guam were excluded as were those who did not report county of residence.

Table A3: Fully adjusted models for guideline-recommended care receipt for annual A1c test, annual foot exam, and annual eye exam, Age  $\geq$  65 Years\*

| Variables                           | $\geq 2$ Annual A1c Tests |         | Annual Foot Exam      |         | Annual Eye Exam       |         |
|-------------------------------------|---------------------------|---------|-----------------------|---------|-----------------------|---------|
|                                     | OR (95% CI)               | P-Value | OR (95% CI)           | P-Value | OR (95% CI)           | P-Value |
| County Economic Level [Competitive] |                           |         |                       |         |                       |         |
| Distressed                          | 0.795 (0.560 - 1.129)     | 0.200   | 0.810 (0.548 - 1.197) | 0.290   | 0.562 (0.383 - 0.827) | 0.003   |
| At-Risk                             | 0.780 (0.571 - 1.064)     | 0.117   | 0.603 (0.431 - 0.844) | 0.003   | 0.739 (0.521 - 1.048) | 0.090   |
| Transitional                        | 0.775 (0.597 - 1.005)     | 0.055   | 0.784 (0.589 - 1.044) | 0.095   | 0.773 (0.570 - 1.048) | 0.097   |
| Non-Appalachian                     | 0.780 (0.612 - 0.995)     | 0.045   | 0.827 (0.633 - 1.081) | 0.164   | 0.865 (0.650 - 1.150) | 0.318   |
|                                     |                           |         |                       |         |                       |         |
| Age, y                              | 0.967 (0.962 - 0.973)     | < 0.001 | 0.989 (0.983 - 0.996) | 0.001   | 1.026 (1.019 - 1.033) | < 0.001 |
| Male                                | 0.784 (0.722 - 0.851)     | < 0.001 | 1.067 (0.973 - 1.171) | 0.168   | 0.962 (0.877 - 1.054) | 0.405   |
|                                     |                           |         |                       |         |                       |         |
| Race/Ethnicity [NH White]           |                           |         |                       |         |                       |         |
| NH Black                            | 0.696 (0.618 - 0.785)     | < 0.001 | 1.667 (1.418 - 1.960) | < 0.001 | 1.285 (1.118 - 1.477) | < 0.001 |
| Hispanic                            | 0.638 (0.512 - 0.795)     | < 0.001 | 0.820 (0.651 - 1.032) | 0.091   | 1.003 (0.797 - 1.263) | 0.978   |
| Other/unknown                       | 0.772 (0.655 - 0.909)     | 0.002   | 0.903 (0.739 - 1.105) | 0.323   | 0.908 (0.749 - 1.100) | 0.324   |
|                                     |                           |         |                       |         |                       |         |
| Married                             | 1.155 (1.069 - 1.249)     | < 0.001 | 0.992 (0.910 - 1.081) | 0.851   | 1.119 (1.024 - 1.223) | 0.013   |
|                                     |                           |         |                       |         |                       |         |
| Household Income [<\$20,000]        |                           |         |                       |         |                       |         |
| \$20,000 - \$34,999                 | 1.112 (1.003 - 1.233)     | 0.043   | 1.040 (0.928 - 1.166) | 0.498   | 1.133 (1.011 - 1.268) | 0.031   |
| \$35,000 - \$74,999                 | 1.194 (1.059 - 1.348)     | 0.004   | 1.086 (0.948 - 1.243) | 0.234   | 1.315 (1.153 - 1.500) | < 0.001 |
| $\geq$ \$75,000                     | 1.216 (1.023 - 1.447)     | 0.027   | 1.041 (0.868 - 1.248) | 0.667   | 1.393 (1.151 - 1.687) | 0.001   |
| Unknown                             | 0.915 (0.818 - 1.023)     | 0.119   | 0.995 (0.875 - 1.130) | 0.933   | 1.150 (1.013 - 1.304) | 0.030   |
|                                     |                           |         |                       |         |                       |         |
| Education [< Some high school]      |                           |         |                       |         |                       |         |

|                              |                       |         |                       |         |                       |         |
|------------------------------|-----------------------|---------|-----------------------|---------|-----------------------|---------|
| Some High School             | 1.107 (0.930 - 1.318) | 0.251   | 1.138 (0.935 - 1.385) | 0.196   | 0.907 (0.750 - 1.097) | 0.313   |
| High School Graduate or GED  | 1.377 (1.178 - 1.609) | < 0.001 | 1.226 (1.037 - 1.449) | 0.017   | 1.143 (0.963 - 1.357) | 0.126   |
| Some College                 | 1.606 (1.356 - 1.902) | < 0.001 | 1.213 (1.009 - 1.459) | 0.040   | 1.306 (1.088 - 1.569) | 0.004   |
| College Graduate or Higher   | 1.979 (1.654 - 2.369) | < 0.001 | 1.407 (1.159 - 1.707) | 0.001   | 1.279 (1.052 - 1.554) | 0.014   |
|                              |                       |         |                       |         |                       |         |
| Employed/Self-Employed       | 1.022 (0.899 - 1.161) | 0.743   | 0.976 (0.852 - 1.117) | 0.720   | 0.904 (0.787 - 1.040) | 0.158   |
|                              |                       |         |                       |         |                       |         |
| BMI [<25 kg/m <sup>2</sup> ] |                       |         |                       |         |                       |         |
| 25 - 29.9 kg/m <sup>2</sup>  | 1.112 (1.006 - 1.228) | 0.037   | 1.253 (1.124 - 1.398) | < 0.001 | 1.082 (0.963 - 1.215) | 0.183   |
| >= 30 kg/m <sup>2</sup>      | 1.240 (1.116 - 1.378) | < 0.001 | 1.308 (1.167 - 1.466) | < 0.001 | 1.131 (1.004 - 1.273) | 0.043   |
| Unknown                      | 1.010 (0.824 - 1.239) | 0.924   | 1.170 (0.917 - 1.494) | 0.207   | 0.925 (0.725 - 1.181) | 0.531   |
|                              |                       |         |                       |         |                       |         |
| Smoking [Never]              |                       |         |                       |         |                       |         |
| Past                         | 1.089 (1.007 - 1.177) | 0.032   | 1.006 (0.921 - 1.098) | 0.897   | 0.950 (0.871 - 1.036) | 0.248   |
| Current                      | 0.910 (0.796 - 1.040) | 0.166   | 0.853 (0.734 - 0.992) | 0.038   | 0.658 (0.571 - 0.758) | < 0.001 |
|                              |                       |         |                       |         |                       |         |
| Exercise                     | 1.165 (1.080 - 1.255) | < 0.001 | 1.228 (1.130 - 1.335) | < 0.001 | 1.137 (1.045 - 1.237) | 0.003   |
| History of Heart Attack      | 0.879 (0.799 - 0.966) | 0.008   | 1.043 (0.936 - 1.163) | 0.443   | 0.892 (0.797 - 0.998) | 0.046   |
| Coronary Heart Disease       | 1.157 (1.052 - 1.274) | 0.003   | 1.053 (0.944 - 1.173) | 0.354   | 1.085 (0.972 - 1.211) | 0.144   |
| Stroke                       | 0.920 (0.820 - 1.031) | 0.151   | 1.006 (0.884 - 1.145) | 0.926   | 1.062 (0.941 - 1.199) | 0.330   |
| Activity limitations         | 1.126 (1.045 - 1.214) | 0.002   | 1.021 (0.939 - 1.112) | 0.624   | 0.903 (0.831 - 0.982) | 0.018   |
| Insulin User                 | 1.433 (1.311 - 1.568) | < 0.001 | 1.726 (1.551 - 1.919) | < 0.001 | 1.260 (1.137 - 1.395) | < 0.001 |
|                              |                       |         |                       |         |                       |         |
| Diabetes Duration [< 5 y]    |                       |         |                       |         |                       |         |
| 5 - 9 y                      | 1.523 (1.371 - 1.693) | < 0.001 | 1.355 (1.212 - 1.515) | < 0.001 | 1.187 (1.058 - 1.332) | 0.004   |
| >= 10 y                      | 1.825 (1.664 - 2.000) | < 0.001 | 1.773 (1.611 - 1.952) | < 0.001 | 1.550 (1.401 - 1.715) | < 0.001 |
|                              |                       |         |                       |         |                       |         |
| Has Health Insurance         | 1.467 (1.100 - 1.955) | 0.009   | 1.057 (0.753 - 1.485) | 0.748   | 1.329 (0.931 - 1.897) | 0.118   |
| Has Personal Doctor          | 1.912 (1.555 - 2.351) | < 0.001 | 1.435 (1.136 - 1.813) | 0.002   | 1.158 (0.922 - 1.452) | 0.207   |
| Cost Barrier to Medical Care | 0.809 (0.695 - 0.941) | 0.006   | 0.754 (0.634 - 0.896) | 0.001   | 0.652 (0.560 - 0.761) | < 0.001 |

|                                             |                       |         |                       |         |                       |         |
|---------------------------------------------|-----------------------|---------|-----------------------|---------|-----------------------|---------|
| Routine Checkup Last 12 Months              | 1.627 (1.447 - 1.829) | < 0.001 | 2.034 (1.791 - 2.309) | < 0.001 | 1.622 (1.431 - 1.838) | < 0.001 |
| Urban residence                             | 1.125 (1.039 - 1.218) | 0.004   | 1.079 (0.987 - 1.180) | 0.093   | 1.141 (1.043 - 1.248) | 0.004   |
| Physicians per 100,000 population in County | 1.034 (0.945 - 1.132) | 0.468   | 0.992 (0.970 - 1.014) | 0.456   | 0.986 (0.964 - 1.009) | 0.239   |
|                                             |                       |         |                       |         |                       |         |
| FQHCs in County [None]                      |                       |         |                       |         |                       |         |
| 1                                           | 1.021 (0.917 - 1.136) | 0.706   | 0.869 (0.769 - 0.982) | 0.024   | 0.957 (0.847 - 1.081) | 0.477   |
| 2 or more                                   | 1.012 (0.920 - 1.113) | 0.808   | 1.004 (0.902 - 1.117) | 0.941   | 0.997 (0.892 - 1.113) | 0.951   |
|                                             |                       |         |                       |         |                       |         |
| Health Professions Shortage Area [None]     |                       |         |                       |         |                       |         |
| Part County                                 | 0.863 (0.768 - 0.970) | 0.014   | 0.998 (0.875 - 1.137) | 0.970   | 0.938 (0.818 - 1.075) | 0.355   |
| Whole County                                | 0.969 (0.865 - 1.086) | 0.591   | 0.994 (0.875 - 1.129) | 0.925   | 0.964 (0.845 - 1.101) | 0.590   |
